# Supplementary material for: Ellipsoid-like Li4Ti5O12–TiO2 composites constructed by nanocrystals for lithium ion batteries
Source: Royal Society of Chemistry journal article supplement (doi:10.1039/c5ra24347e), 2016-01-01
Supplement: c5ra24347e1.pdf [file c5ra24347e1.pdf]

## Supporting information

### Ellipsoid-like $\text{Li}_4\text{Ti}_5\text{O}_{12}$ - $\text{TiO}_2$ composite constructed by nanocrystals for lithium ion batteries

Wenjun Zhu, Hui Yang and Xingzhong Guo \*

*School of Materials Science and Engineering, Zhejiang University, 38 Zheda Road,  
Xihu District, Hangzhou 310027, China.*

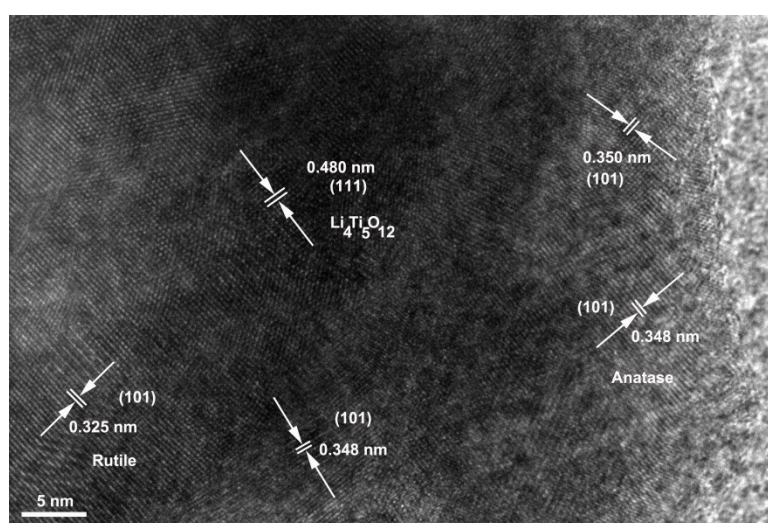

Fig. S1 Typical high-resolution TEM image of  $\text{Li}_4\text{Ti}_5\text{O}_{12}$ - $\text{TiO}_2$  composite.
